# Supplementary material
Source: PubMed Central journal article supplement (PMC6512970)
Supplement: NIHMS1018810-supplement-Supplement.pdf [file NIHMS1018810-supplement-Supplement.pdf]

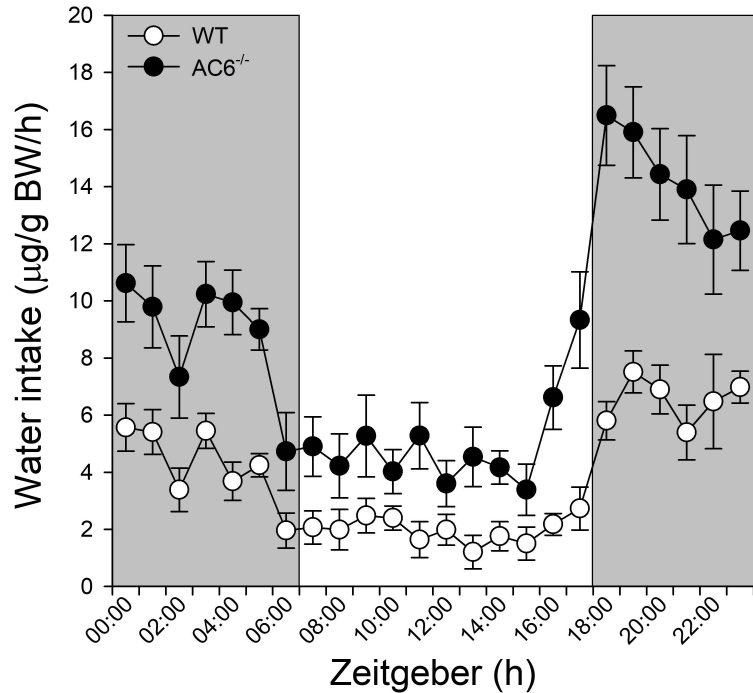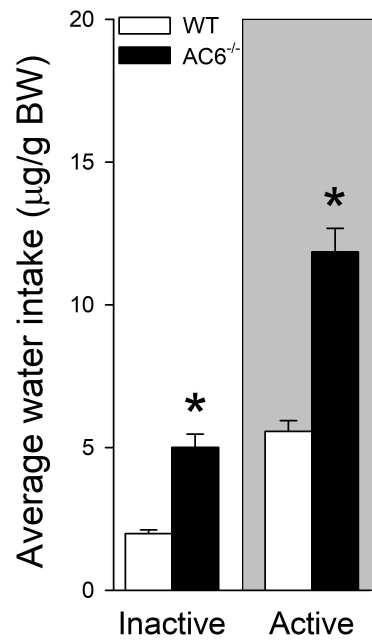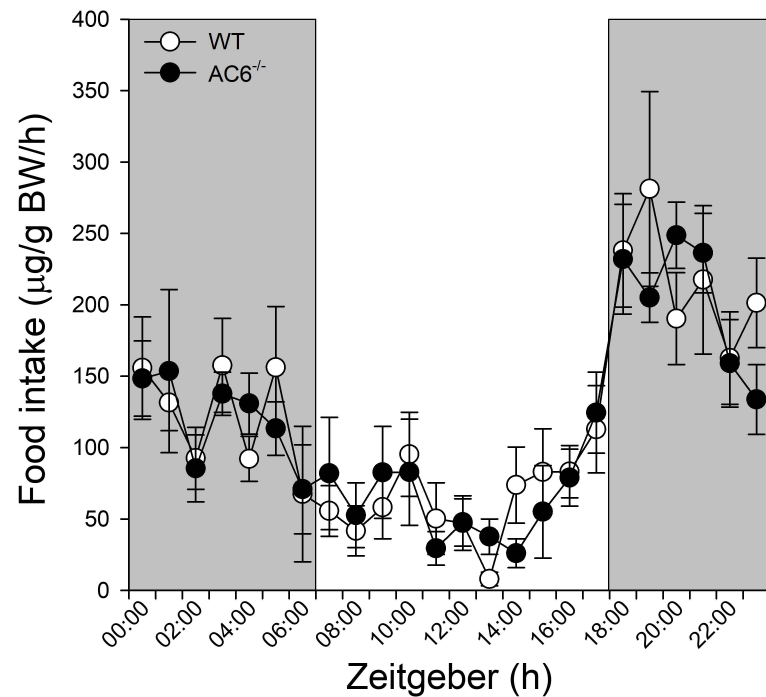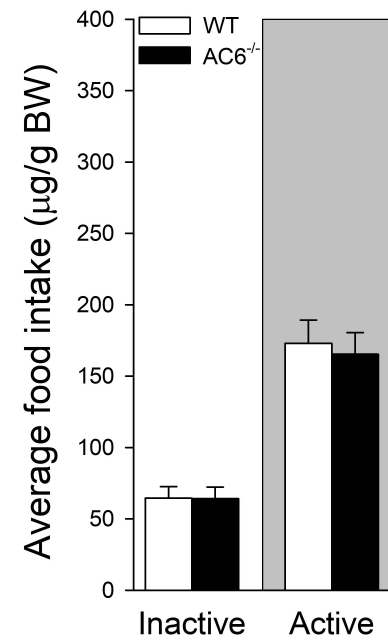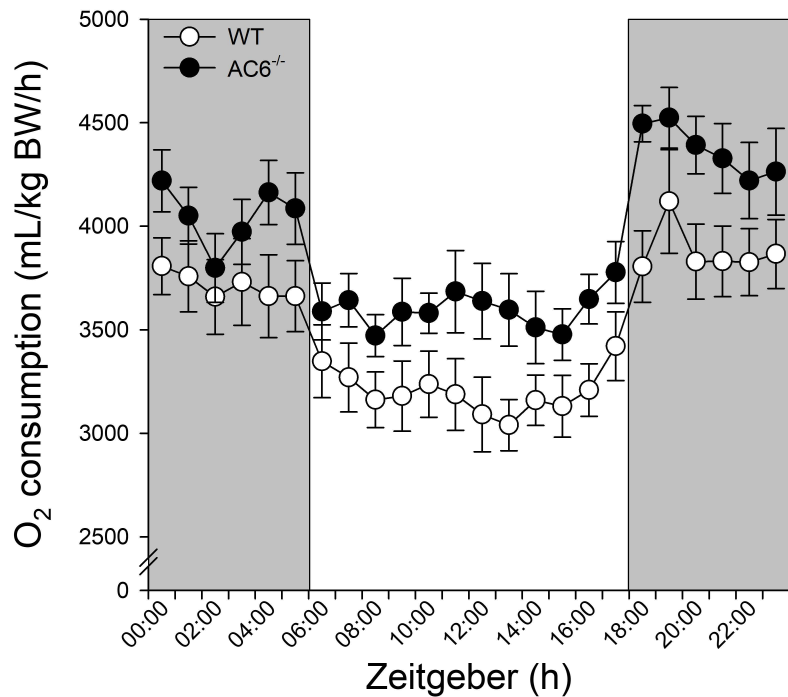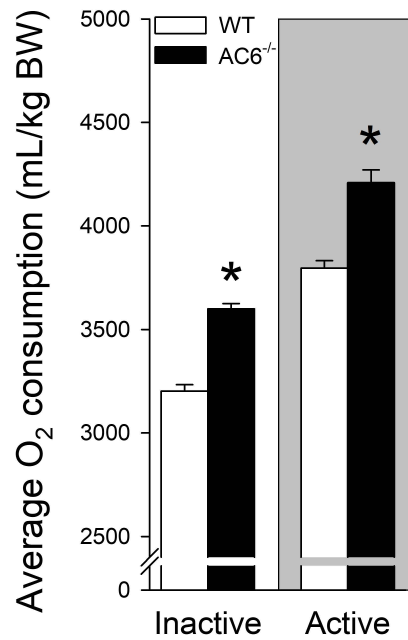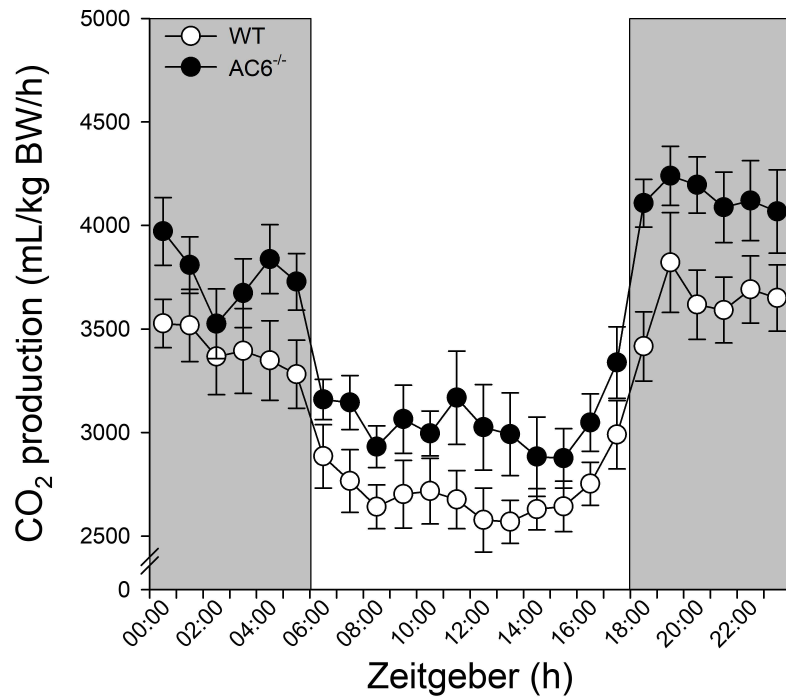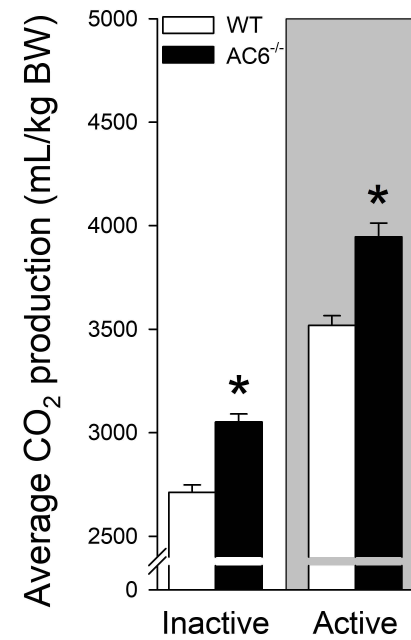

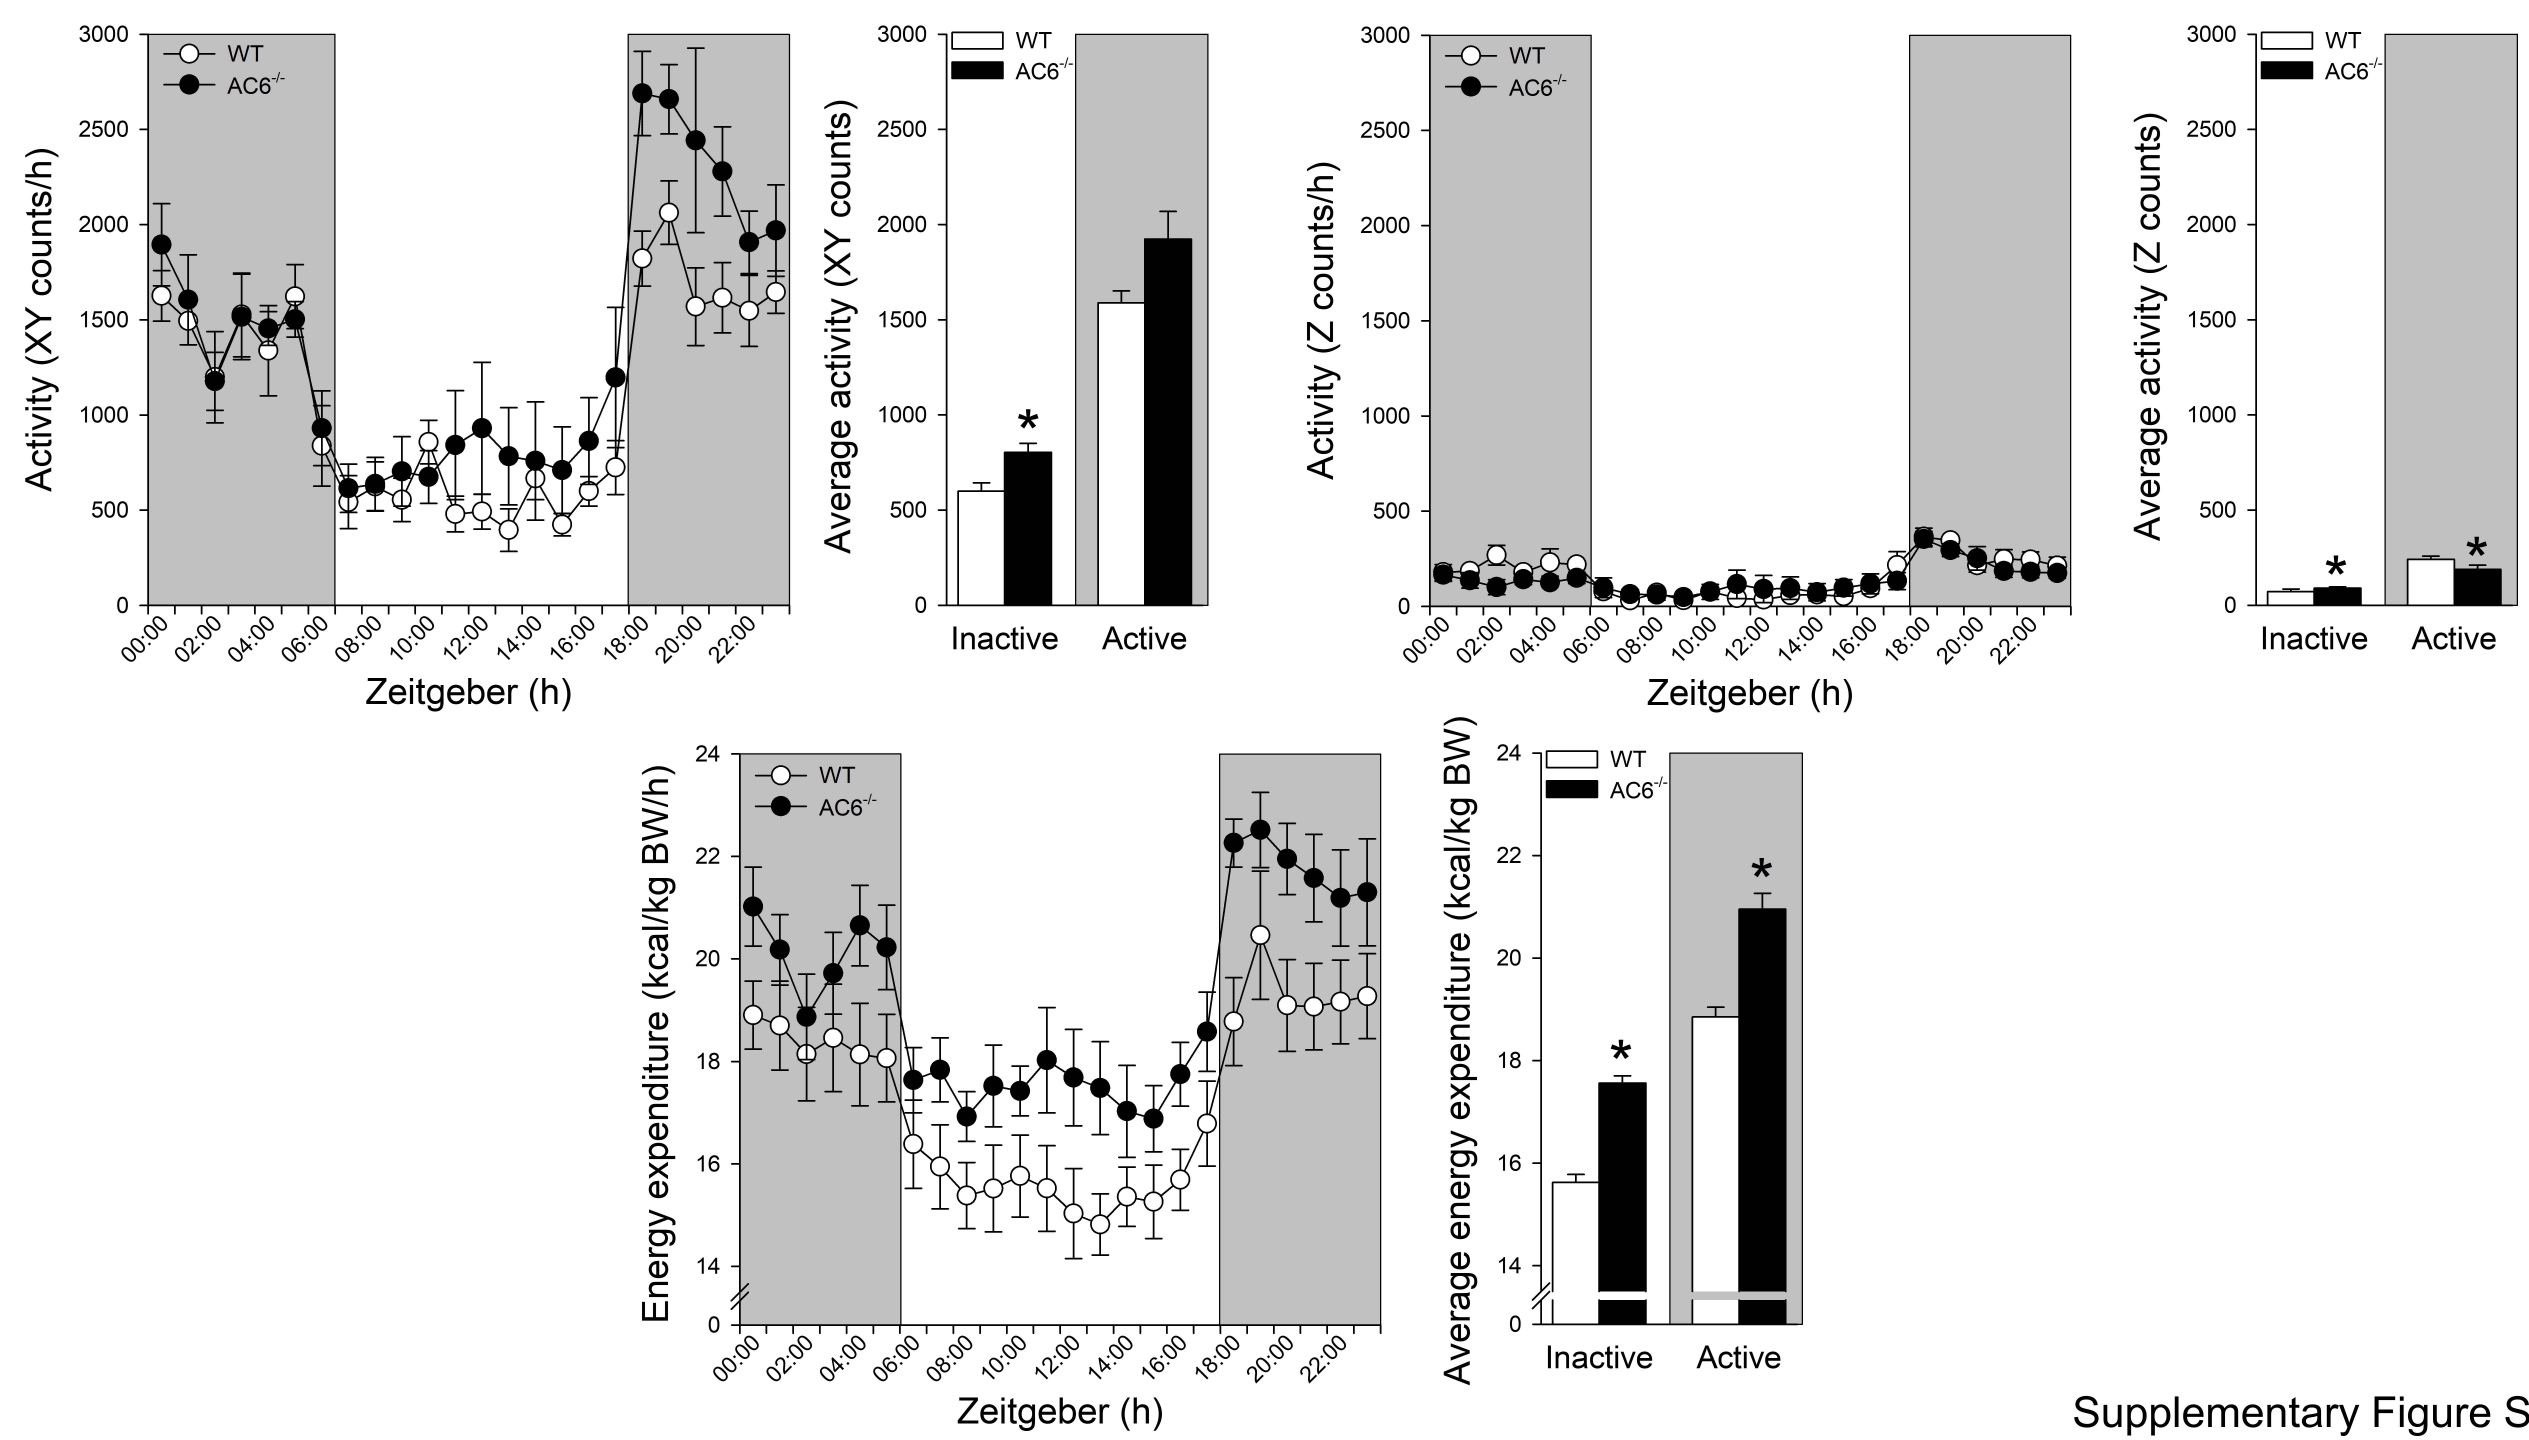

Supplementary Figure S2

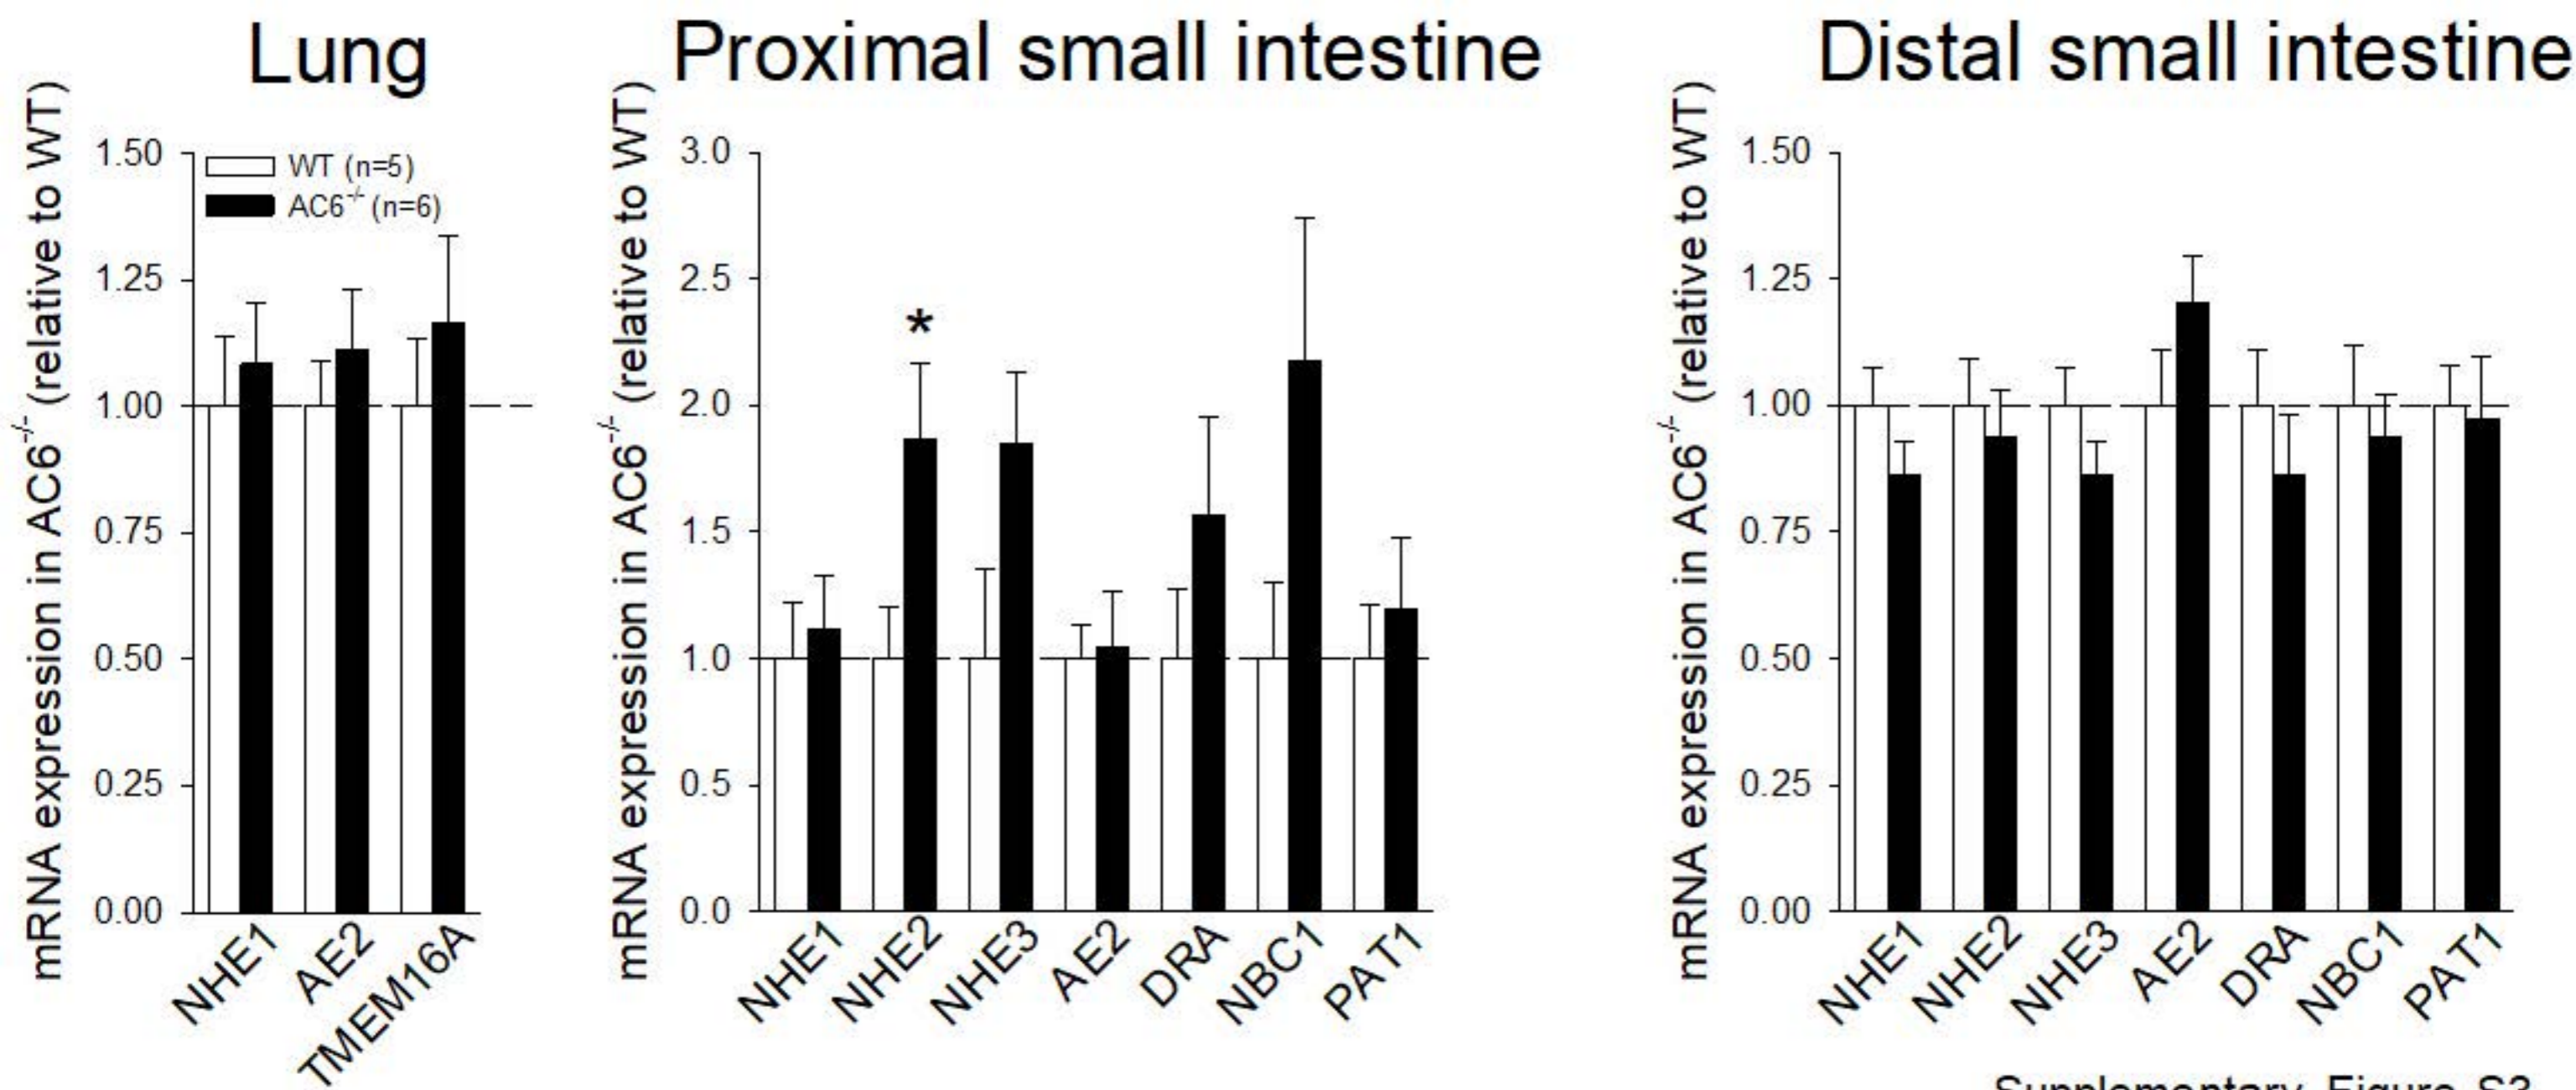

Supplementary Figure S3

# HCO<sub>3</sub><sup>-</sup>-loading

PCNA

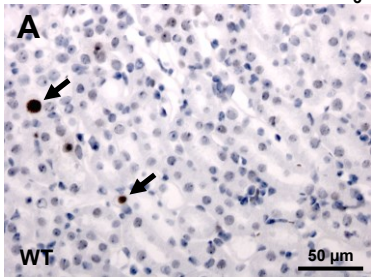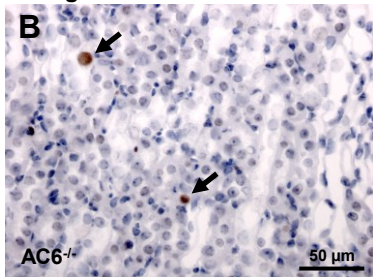

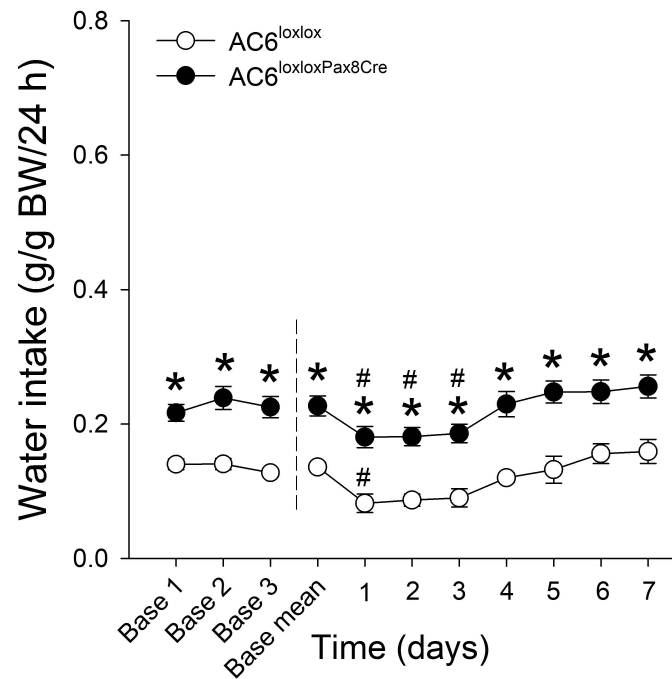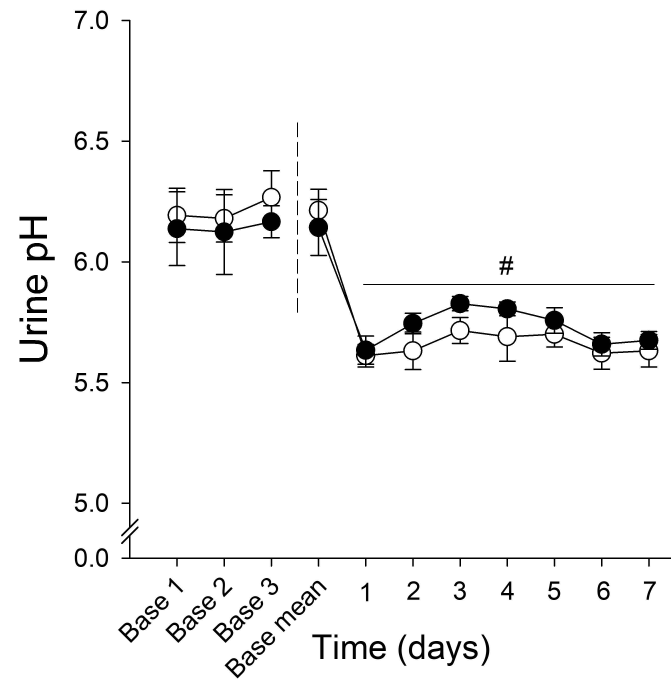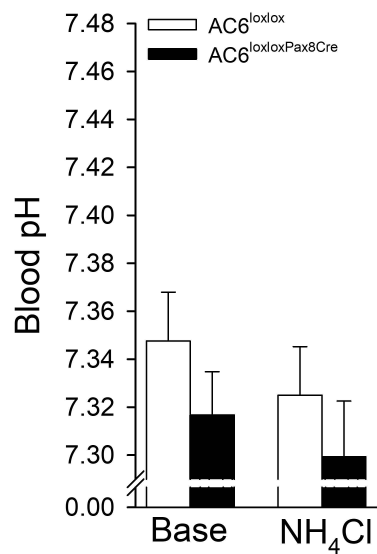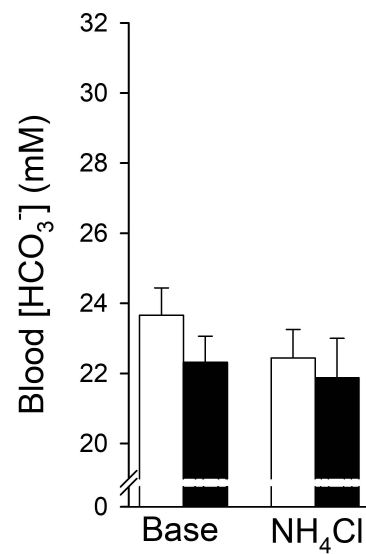

Supplementary Figure S5

## Supplementary Figure Legends

**Supplementary Figure S1.** AC6<sup>-/-</sup> mice have normal circadian rhythm but elevated O<sub>2</sub> consumption and CO<sub>2</sub> production. Consistent with our previously published data (1) AC6<sup>-/-</sup> mice show increased fluid intake. The experiments in PhenoMaster<sup>®</sup> metabolic cages identified a significantly higher water intake during their inactive and active period. No differences in food intake were observed between genotypes. Both, O<sub>2</sub> consumption and CO<sub>2</sub> production were significantly higher during the inactive and active period in AC6<sup>-/-</sup> versus WT mice. *n*=6/genotype, \**P*<0.05 versus WT.

**Supplementary Figure S2.** AC6<sup>-/-</sup> mice have increased energy expenditure. Experiments in PhenoMaster<sup>®</sup> metabolic cages identified that activity in the XY-axis was significantly higher in AC6<sup>-/-</sup> during the inactive period. Activity in the Z-axis is only a fraction compared to the XY activity. Whereas 24-hour Z-axis activity was not different between genotypes, Z-activity in AC6<sup>-/-</sup> mice was elevated and reduced during the inactive and active period, respectively. AC6<sup>-/-</sup> mice have, independent of the active/inactive period, increased energy expenditure compared to WT mice. *n*=6/genotype, \**P*<0.05 versus WT.

**Supplementary Figure S3.** mRNA expression of various transporters and channels in lung and proximal/distal small intestine of WT (*n*=5) and AC6<sup>-/-</sup> (*n*=6) mice. No differences between genotypes were observed in lung tissue mRNA expression. The proximal small intestine of AC6<sup>-/-</sup> mice had significantly higher expression of NHE2, and tendencies for higher NHE3 and NBC1 expression. No significant differences in transporter profiles were observed between genotypes in the distal small intestine. \**P*<0.05 versus WT. Na<sup>+</sup>-H<sup>+</sup> exchanger 1, NHE1; Na<sup>+</sup>-H<sup>+</sup> exchanger 2, NHE2; Na<sup>+</sup>-H<sup>+</sup> exchanger 3, NHE3, anion exchanger 2, AE2; down regulated in adenoma, DRA; Na<sup>+</sup>-HCO<sub>3</sub><sup>-</sup> cotransporter 1, NBC1; putative anion transporter 1, PAT1; Ca<sup>2+</sup>-activated Cl<sup>-</sup> channel, TMEM16A.

**Supplementary Figure S4.** AC6<sup>-/-</sup> mice do not present more PCNA-positive cells HCO<sub>3</sub><sup>-</sup> after 8 days of HCO<sub>3</sub><sup>-</sup> challenge. Representative light microscopy images of 2-μm kidney sections from AC6<sup>-/-</sup> and WT mice subjected to HCO<sub>3</sub><sup>-</sup> challenge for 8 days. Immunolabeling was performed using an antibody targeting PCNA. (A and B) No difference was found between the numbers of cells labeled for PCNA in AC6<sup>-/-</sup> compared to WT mice. *n*=6/genotype. Arrows indicate PCNA labeled cells.

**Supplementary Figure S5.** No differences were observed between AC6<sup>loxlox</sup> and AC6<sup>loxloxPax8Cre</sup> mice in response to 7 days of NH<sub>4</sub>Cl challenge. Because daily water intake is double in AC6<sup>loxloxPax8Cre</sup> mice, NH<sub>4</sub>Cl was supplied to this genotype at a 50% lower concentration compared to AC6<sup>loxlox</sup> mice (0.14 M in AC6<sup>loxloxPax8Cre</sup> versus 0.28 M in

AC6<sup>loxlox</sup> mice). Fluid intake was slightly but significantly reduced on day 1 in AC6<sup>loxlox</sup> mice and on days 1-3 in AC6<sup>loxlox</sup>Pax8<sup>Cre</sup> mice. Urinary pH was lowered to a similar extent during NH<sub>4</sub>Cl challenge (n=7-8/genotype). Blood pH and HCO<sub>3</sub><sup>-</sup> concentrations were not significantly different between genotypes and did not significantly change after 7 days NH<sub>4</sub>Cl challenge (n=7-8). \**P*<0.05 versus AC6<sup>loxlox</sup>, #*P*<0.05 baseline mean versus NH<sub>4</sub>Cl challenge in both genotypes. Statistical comparisons on left and right side of dashed line in panel were performed separately using two-way repeated measurements ANOVAs. Values indicate mean ± S.E.M. Base, Baseline.

1. Rieg T, Tang T, Murray F, Schroth J, Insel PA, Fenton RA, et al. Adenylate cyclase 6 determines cAMP formation and aquaporin-2 phosphorylation and trafficking in inner medulla. *J Am Soc Nephrol.* 2010;21(12):2059-68.
